# Supplementary material for: Engineering bacterial biomanufacturing: characterization and manipulation of Sphingomonas sp. LM7 extracellular polymers
Source: Royal Society of Chemistry journal article supplement (doi:10.1039/d4sm00712c), 2024-01-01
Supplement: d4sm00712c1.pdf [file d4sm00712c1.pdf]

# Supporting Information: Engineering Bacterial Polymers for Biomanufacturing: Characterization and Manipulation of *Sphingomonas sp. LM7* Extracellular Polysaccharide

Ellen W. van Wijngaarden <sup>†</sup>, Alexandra G. Goetsch <sup>‡</sup>, Ilana L. Brito <sup>¶</sup>, David M.  
Hershey <sup>‡</sup>, and Meredith N. Silberstein <sup>†</sup>

<sup>†</sup>*Sibley School of Mechanical and Aerospace Engineering, Cornell University, Ithaca, NY*

<sup>‡</sup>*Department of Bacteriology, University of Wisconsin-Madison, Madison, WI*

<sup>¶</sup>*Meinig School of Biomedical Engineering, Cornell University, Ithaca, NY 14853, USA*

E-mail: [meredith.silberstein@cornell.edu](mailto:meredith.silberstein@cornell.edu)

Phone: 607/255-5063

# Contents

## 1 Supporting Figures

|                                                                                        |   |
|----------------------------------------------------------------------------------------|---|
| 1.1 Uniaxial Tensile Tests . . . . .                                                   | 2 |
| 1.2 The Effect of Water Content on Rheological Properties: Strain Sweep . . . . .      | 2 |
| 1.3 How Bivalent and Monovalent Ions alter Rheological Properties: Strain Sweep . . .  | 3 |
| 1.4 Dialysis-Based Purification Process . . . . .                                      | 3 |
| 1.5 The Effect of Ultracentrifugation on Lectin Binding and Rheological Properties . . | 5 |
| 1.6 Rheological Properties of Protein Knockout Material . . . . .                      | 5 |
| 1.7 Extracellular DNA Analysis . . . . .                                               | 6 |
| 1.8 Thermogravimetric Analysis . . . . .                                               | 7 |

## 2 Supporting Tables

|                                           |   |
|-------------------------------------------|---|
| 2.1 Strains Used in This Study . . . . .  | 8 |
| 2.2 Plasmids Used in This Study . . . . . | 8 |

# 1 Supporting Figures

## 1.1 Uniaxial Tensile Tests

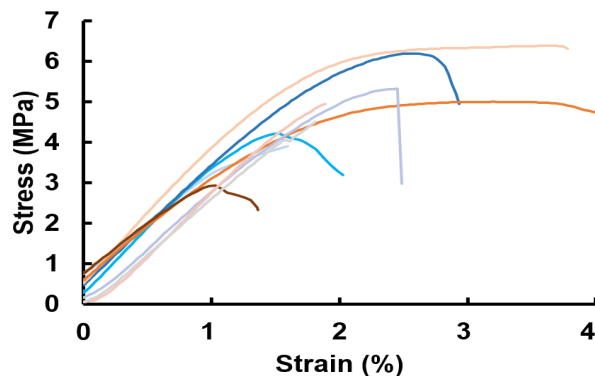

Figure S1: Tensile testing trials for films showing variation in the fracture strength of the material. Young's Modulus is consistent among tests.

## 1.2 The Effect of Water Content on Rheological Properties: Strain Sweep

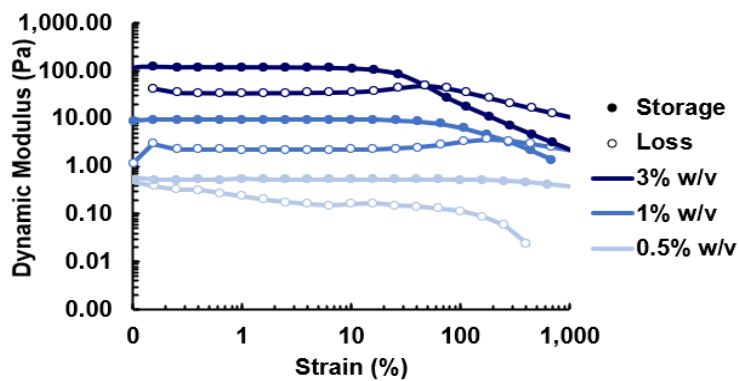

Figure S2: Strain sweep results comparing sample water content showing the gel-like behavior. Dynamic moduli increase for higher w/v ratios.

### 1.3 How Bivalent and Monovalent Ions alter Rheological Properties: Strain Sweep

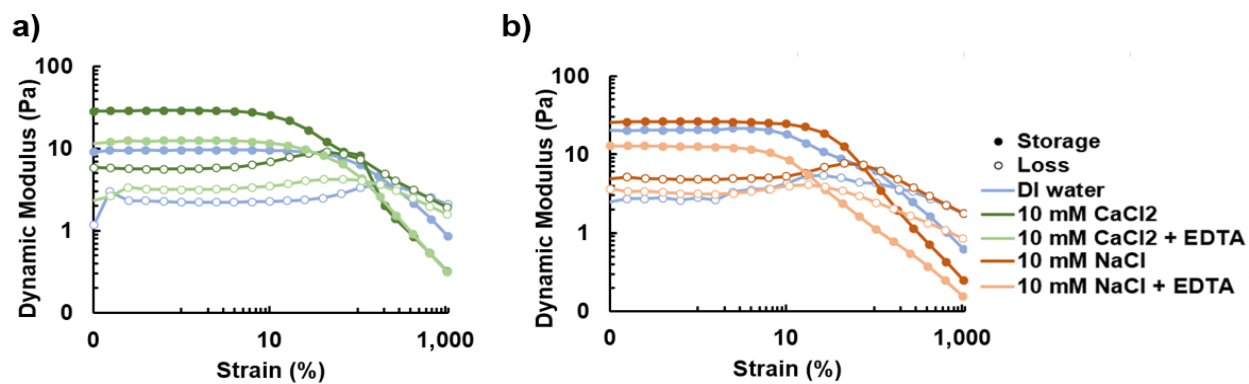

Figure S3: Strain sweep results comparing the addition of a) bivalent ions and b) monovalent ions.

## 1.4 Dialysis-Based Purification Process

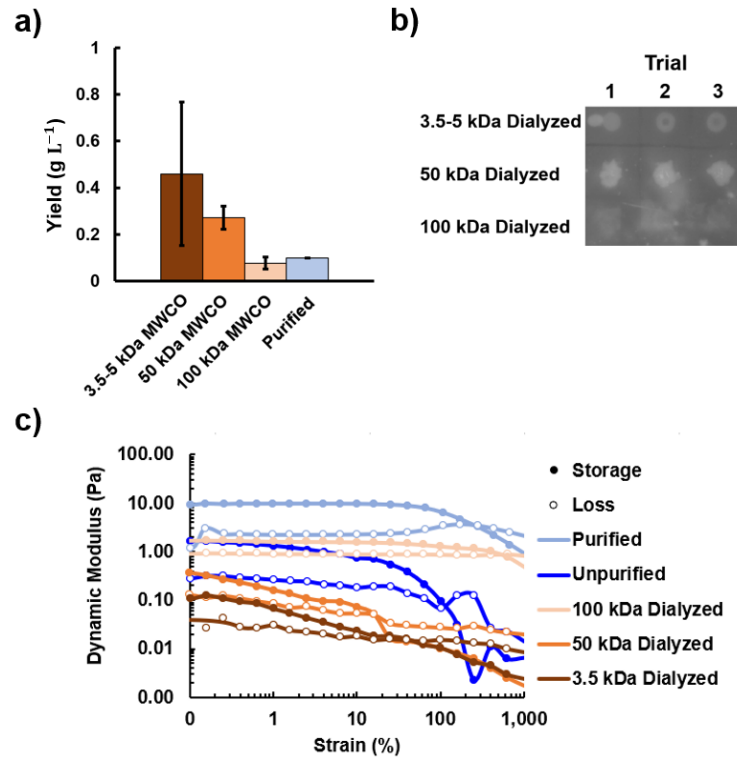

Figure S4: a) Magnified view of sample yields from varying dialysis MWCO values compared to the yield of the full enzymatic purification process. b) A dot blot showing lectin-glycan binding for dialysis groups confirming the presence of polysaccharide c) Strain sweep of samples at various levels of purification.

## 1.5 The Effect of Ultracentrifugation on Lectin Binding and Rheological Properties

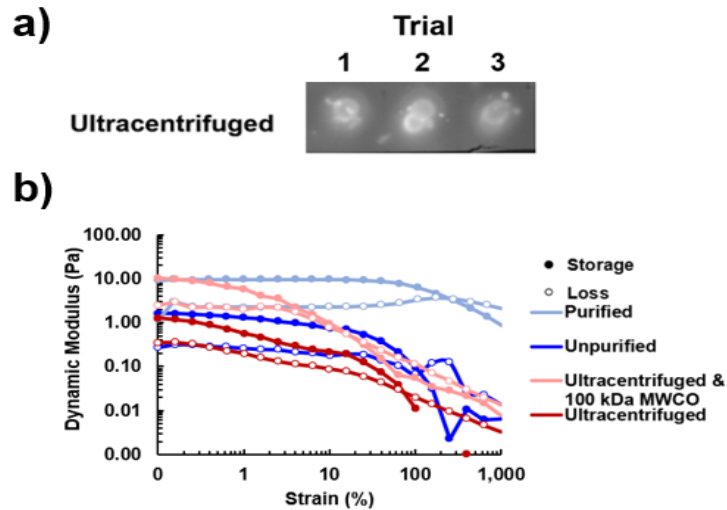

Figure S5: a) A dot blot showing lectin-glycan binding in the sample confirming the presence of polysaccharide post ultracentrifugation. b) Strain sweep of purified, unpurified, and ultracentrifuged samples.

## 1.6 Rheological Properties of Protein Knockout Material

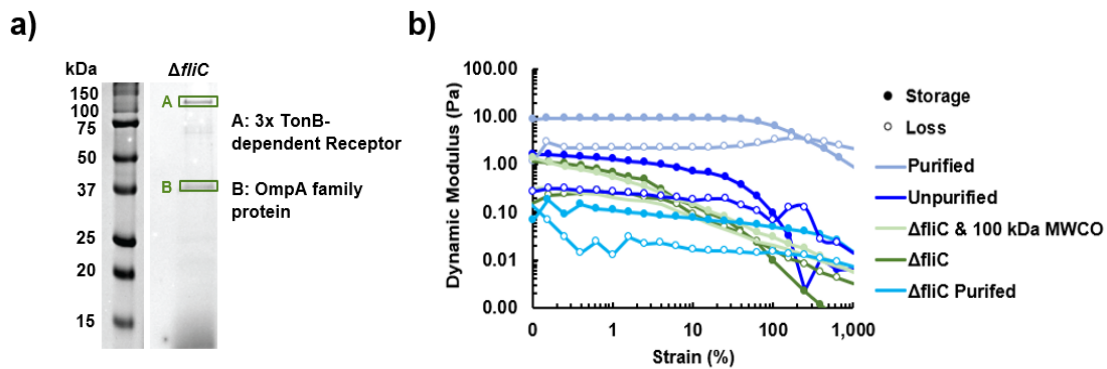

Figure S6: a) Secreted proteins from the  $\Delta prmJ \Delta fliC$  strain b) Strain sweep of purified, unpurified, and protein knockout material samples.

## 1.7 Extracellular DNA Analysis

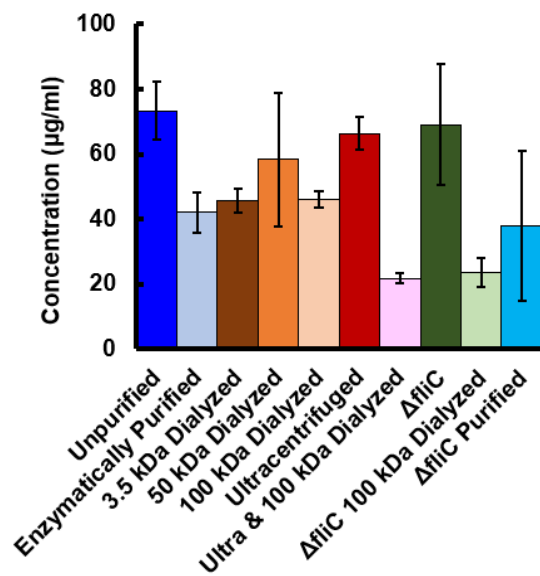

Figure S7: Extracellular DNA abundance in samples tested.

## 1.8 Thermogravimetric Analysis

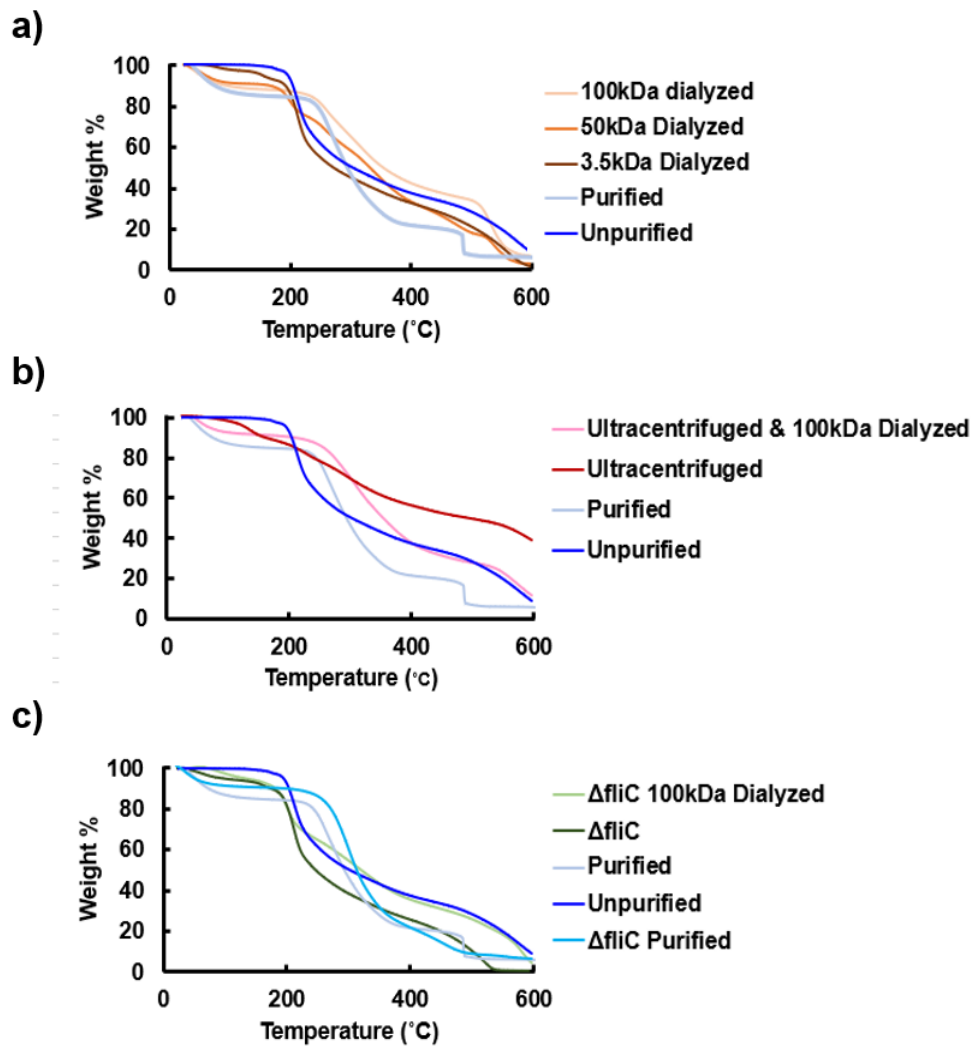

Figure S8: Thermogravimetric analysis for a) dialyzed material, b) ultracentrifuged material and c) protein knockout material.



## 2 Supporting Tables

### 2.1 Strains Used in this Study

Table S1: Strains used in this Study

| Strain | Organism                    | Genotype                  | Description                                            | Source         |
|--------|-----------------------------|---------------------------|--------------------------------------------------------|----------------|
| DH173  | <i>Sphingomonas sp.</i> LM7 | LM7                       | Wild Type                                              | Hershey Lab[1] |
| DH313  | <i>Sphingomonas sp.</i> LM7 | $\Delta prmJ$             | In frame deletion of BXU08_RS00395                     | Hershey Lab[1] |
| DH1312 | <i>Sphingomonas sp.</i> LM7 | $\Delta fliC$             | In frame deletion of BXU08_RS13585                     | This work      |
| DH1313 | <i>Sphingomonas sp.</i> LM7 | $\Delta prmJ \Delta fliC$ | In frame deletion of BXU08_RS13585 in DH313 background | This work      |

### 2.2 Plasmids Used in this Study

Table S2: Plasmids used in this Study

| Plasmid  | Description                                                                                                                                    | Antibiotic | Reference      |
|----------|------------------------------------------------------------------------------------------------------------------------------------------------|------------|----------------|
| pNPTS138 | Suicide plasmid for deletion in <i>Sphingomonas sp.</i> LM7; carries <i>sacB</i> for counter-selection                                         | Km         | M. Alley[1]    |
| pDH298   | To delete <i>prmJ</i> ; Gibson cloning of fused upstream and downstream regions of BXU08_RS00395                                               | Km         | Hershey Lab[1] |
| pDH1329  | To delete <i>fliC</i> ; commercial synthesis of fused BXU08_RS13585 upstream and downstream regions, inserted into SpeI/HindIII site of pDH100 | Km         | Hershey Lab[1] |
| pDH1331  | To delete <i>fliC</i> ; commercial synthesis of fused BXU08_RS13585 upstream and downstream regions, inserted into SpeI/HindIII site of pDH100 | Km         | This work      |

## References

- [1] Alexandra G. Goetsch et al. *A novel exopolysaccharide pathway from a freshwater Sphingomonas isolate*. Nov. 4, 2023. DOI: 10.1101/2023.11.03.565537. URL: <https://www.biorxiv.org/content/10.1101/2023.11.03.565537v1> (visited on 11/13/2023).
